# Supplementary material for: LLDPE/ZnAl LDH-exfoliated nanocomposites: effects of nanolayers on thermal and mechanical properties
Source: Royal Society of Chemistry journal article supplement (doi:10.1039/b401790k), 2004-01-01
Supplement: b401790k.doc [file b401790k.doc]

**Supporting Information**

Figure S1 shows the TGA curve of Zn3Al(DS) powder. It can be seen that the residues of Zn3Al(DS) powder is about 63%. Consequently, the residues of NC2, NC5, NC10, and NC20 nanocomposites are expected to have residues of 1.3%, 3.2%, 6.3%, and 12.6%, respectively. The higher residues in experiments suggest that the existence of exfoliated Zn3Al(DS) nanolayers in the nanocomposites promotes the charring process of LLDPE matrix, especially for NC2 sample.


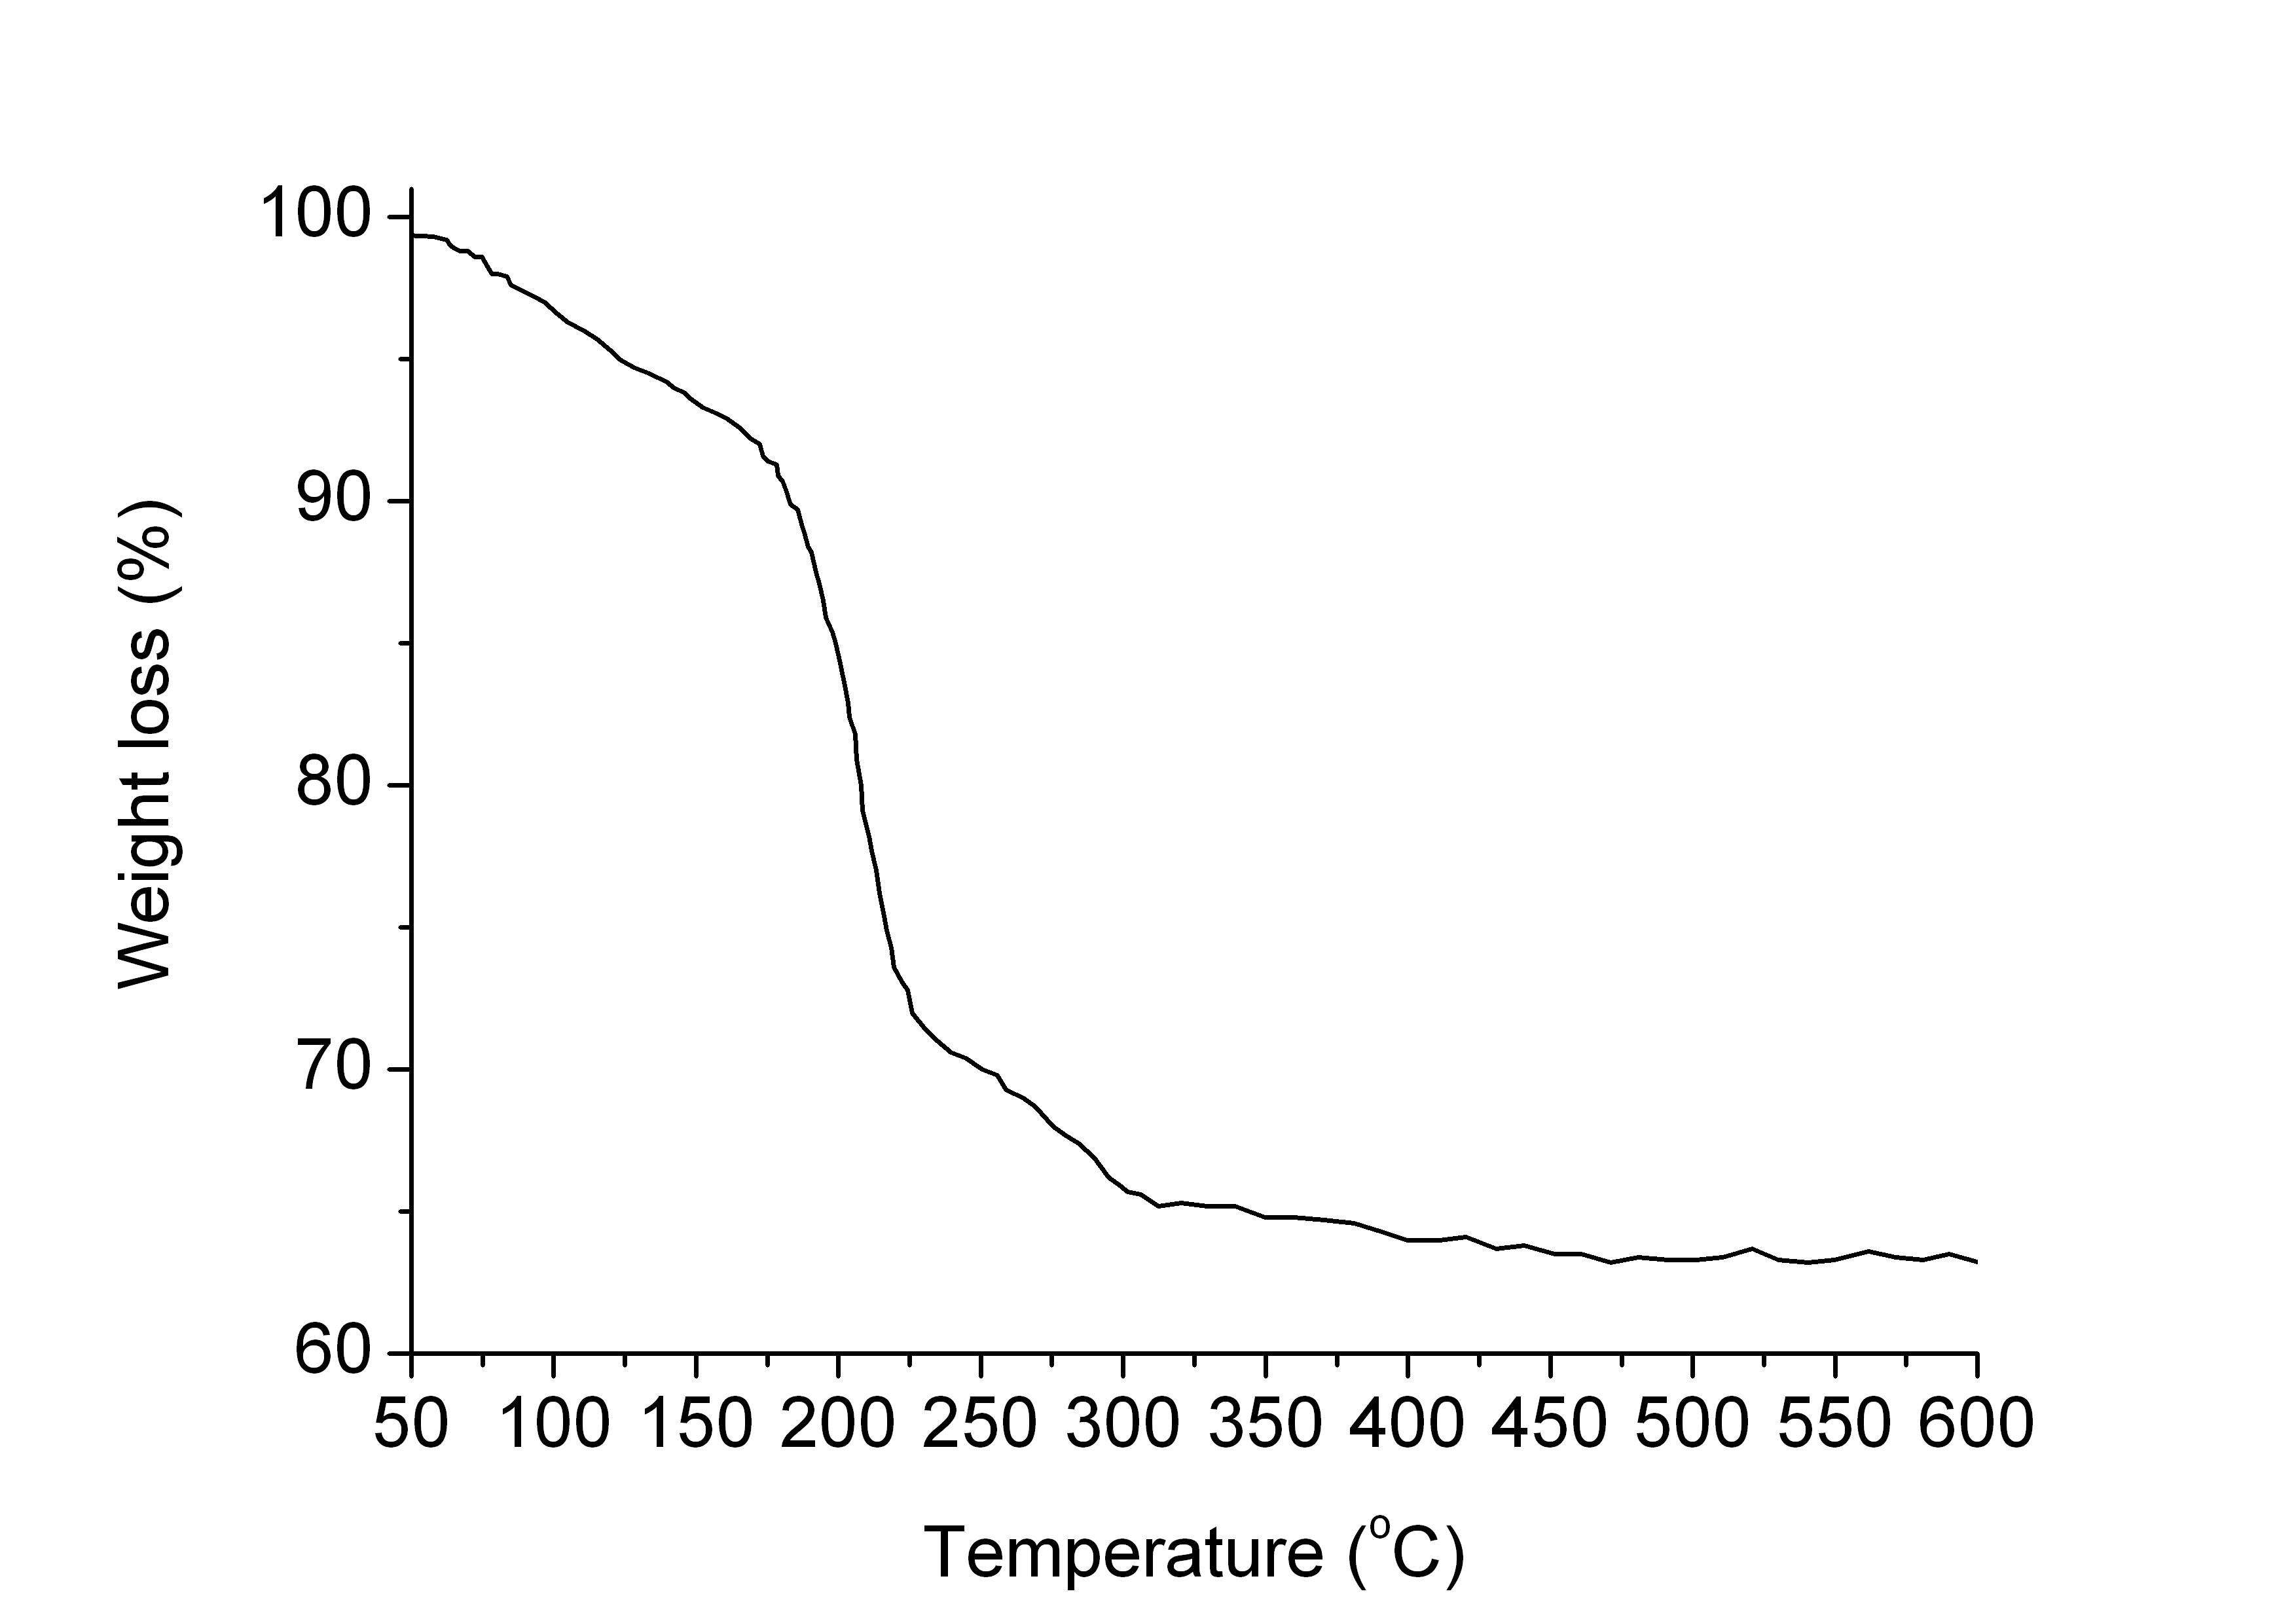


**Figure S1.** TGA curve of Zn3Al(DS) with heating rate of 10 ºC/min under an air flow.

Figure S2 shows that the TGA curves of LLDPE and its nanocomposites heated in air at several heating rates between 10 and 40 ºC/min. It is clearly seen that the degradation curves are shifted to higher temperatures with the increasing heating rates.


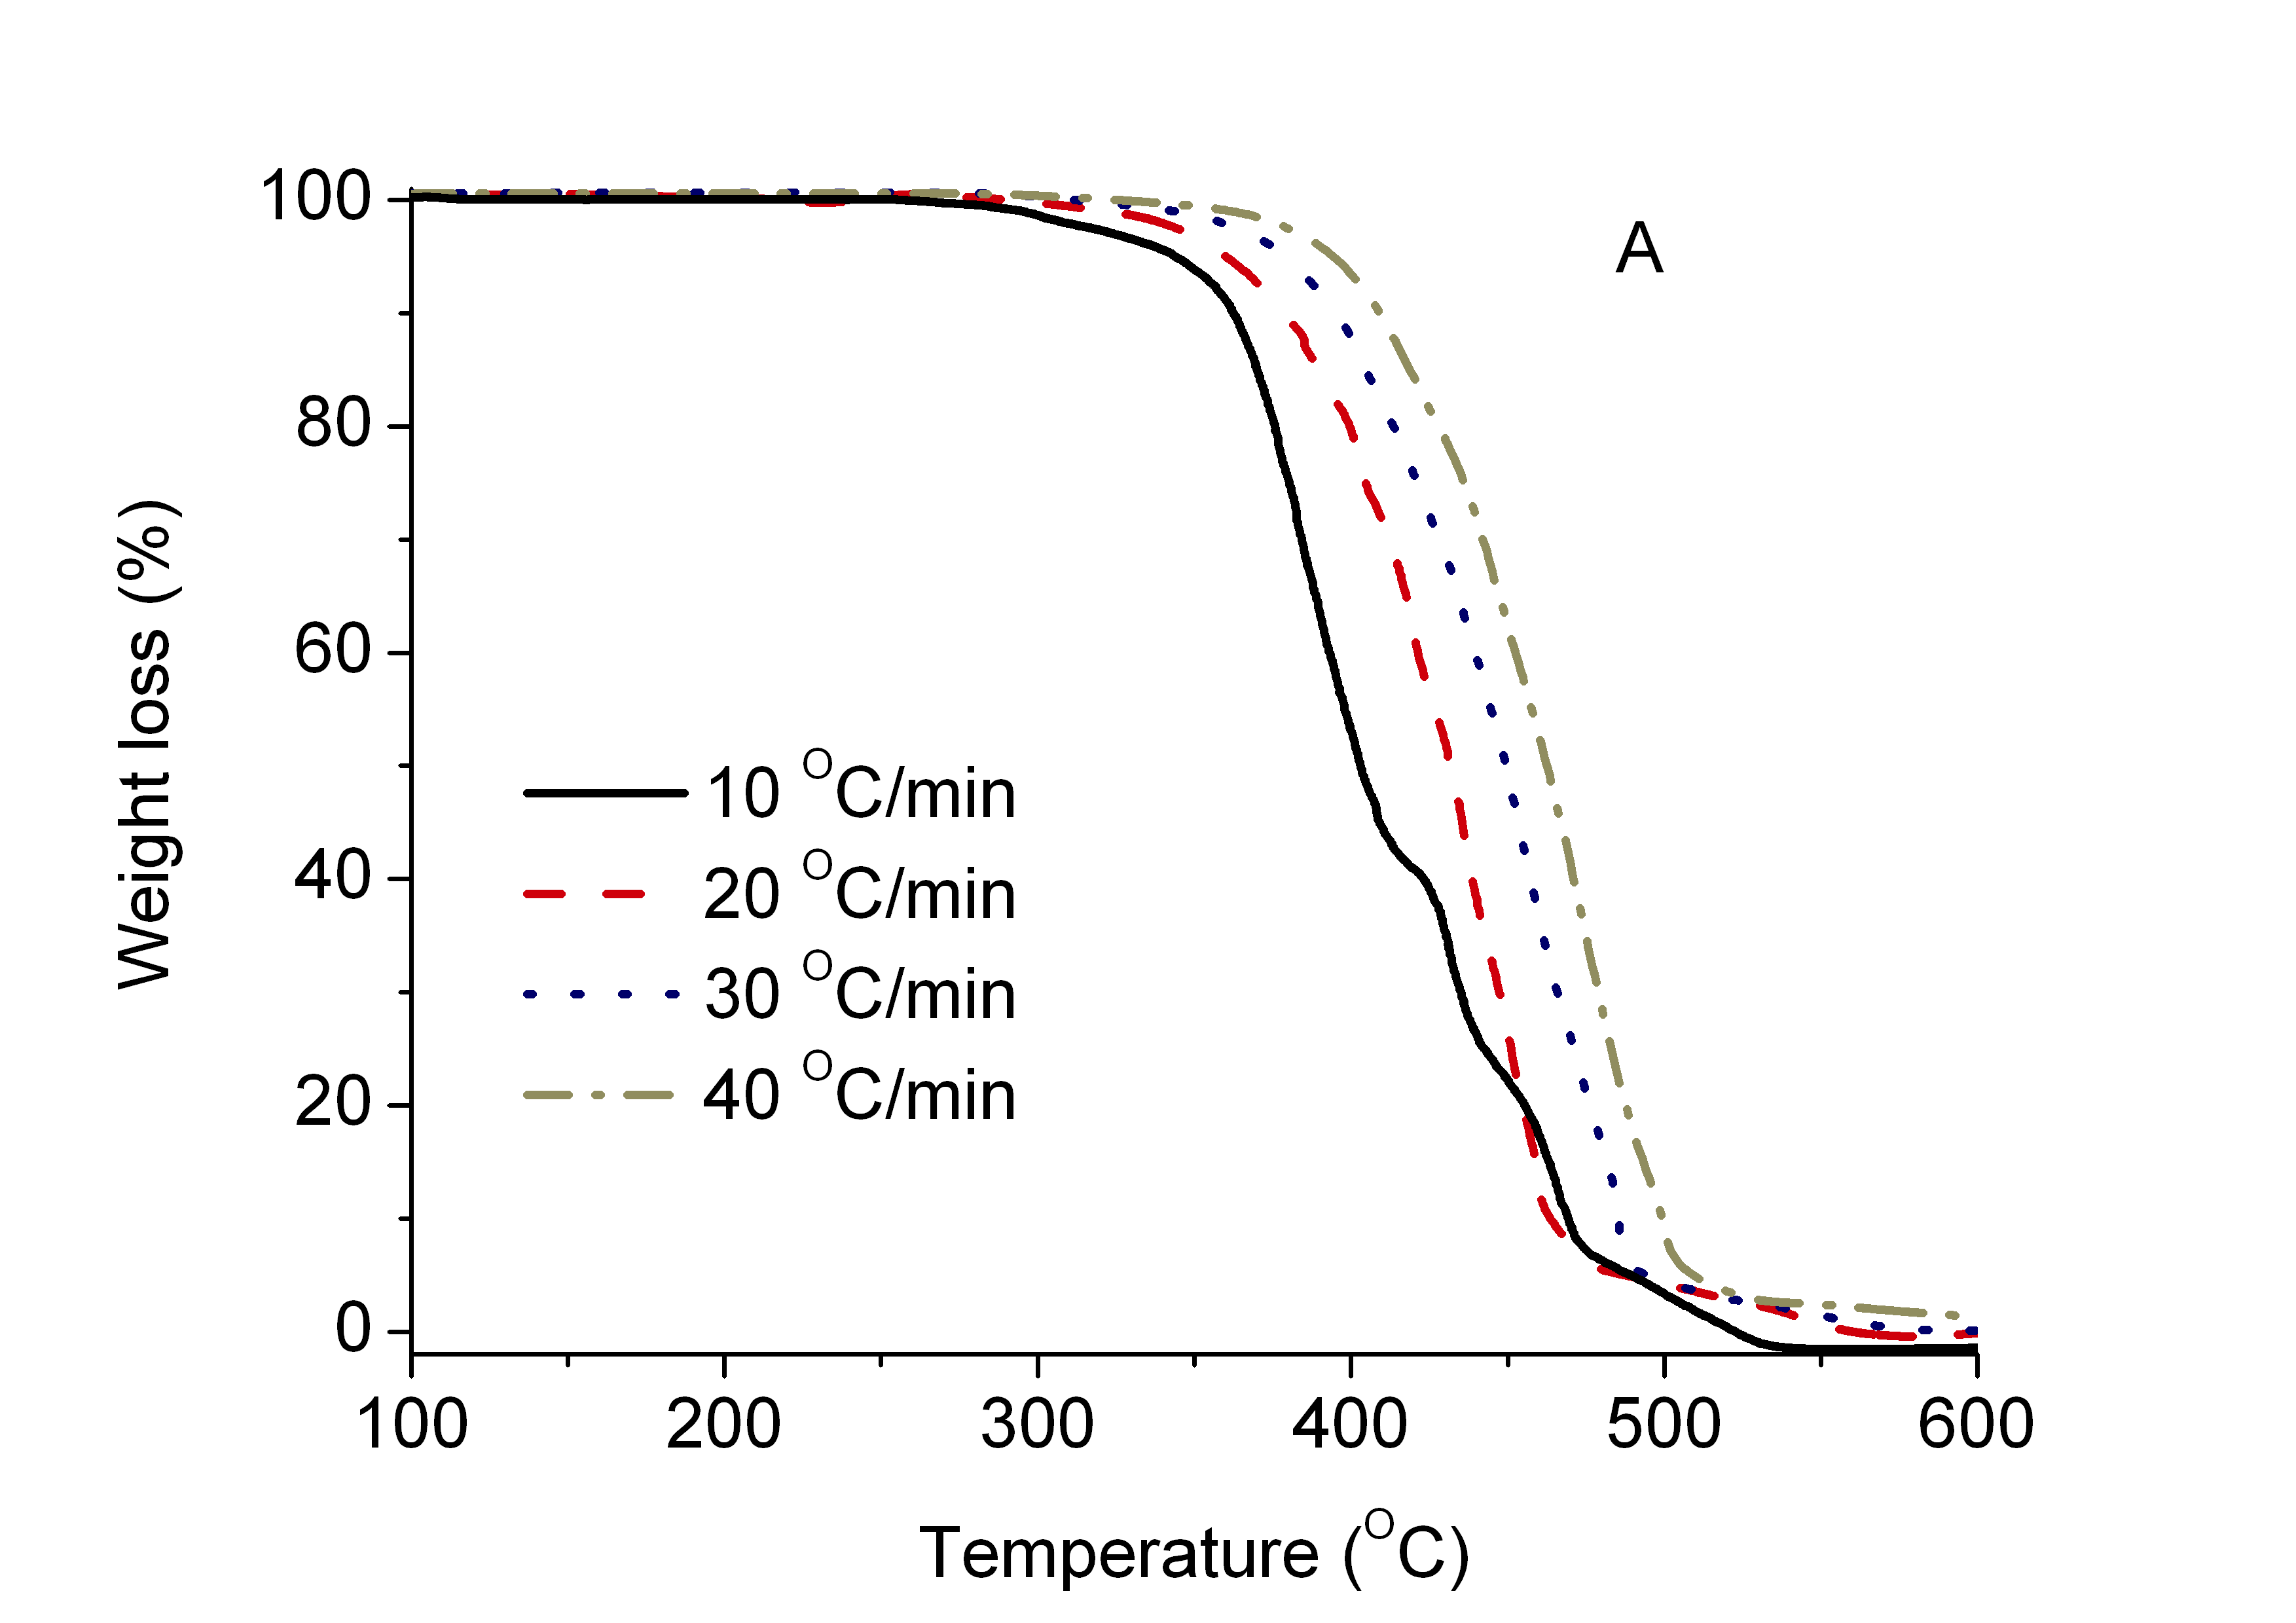


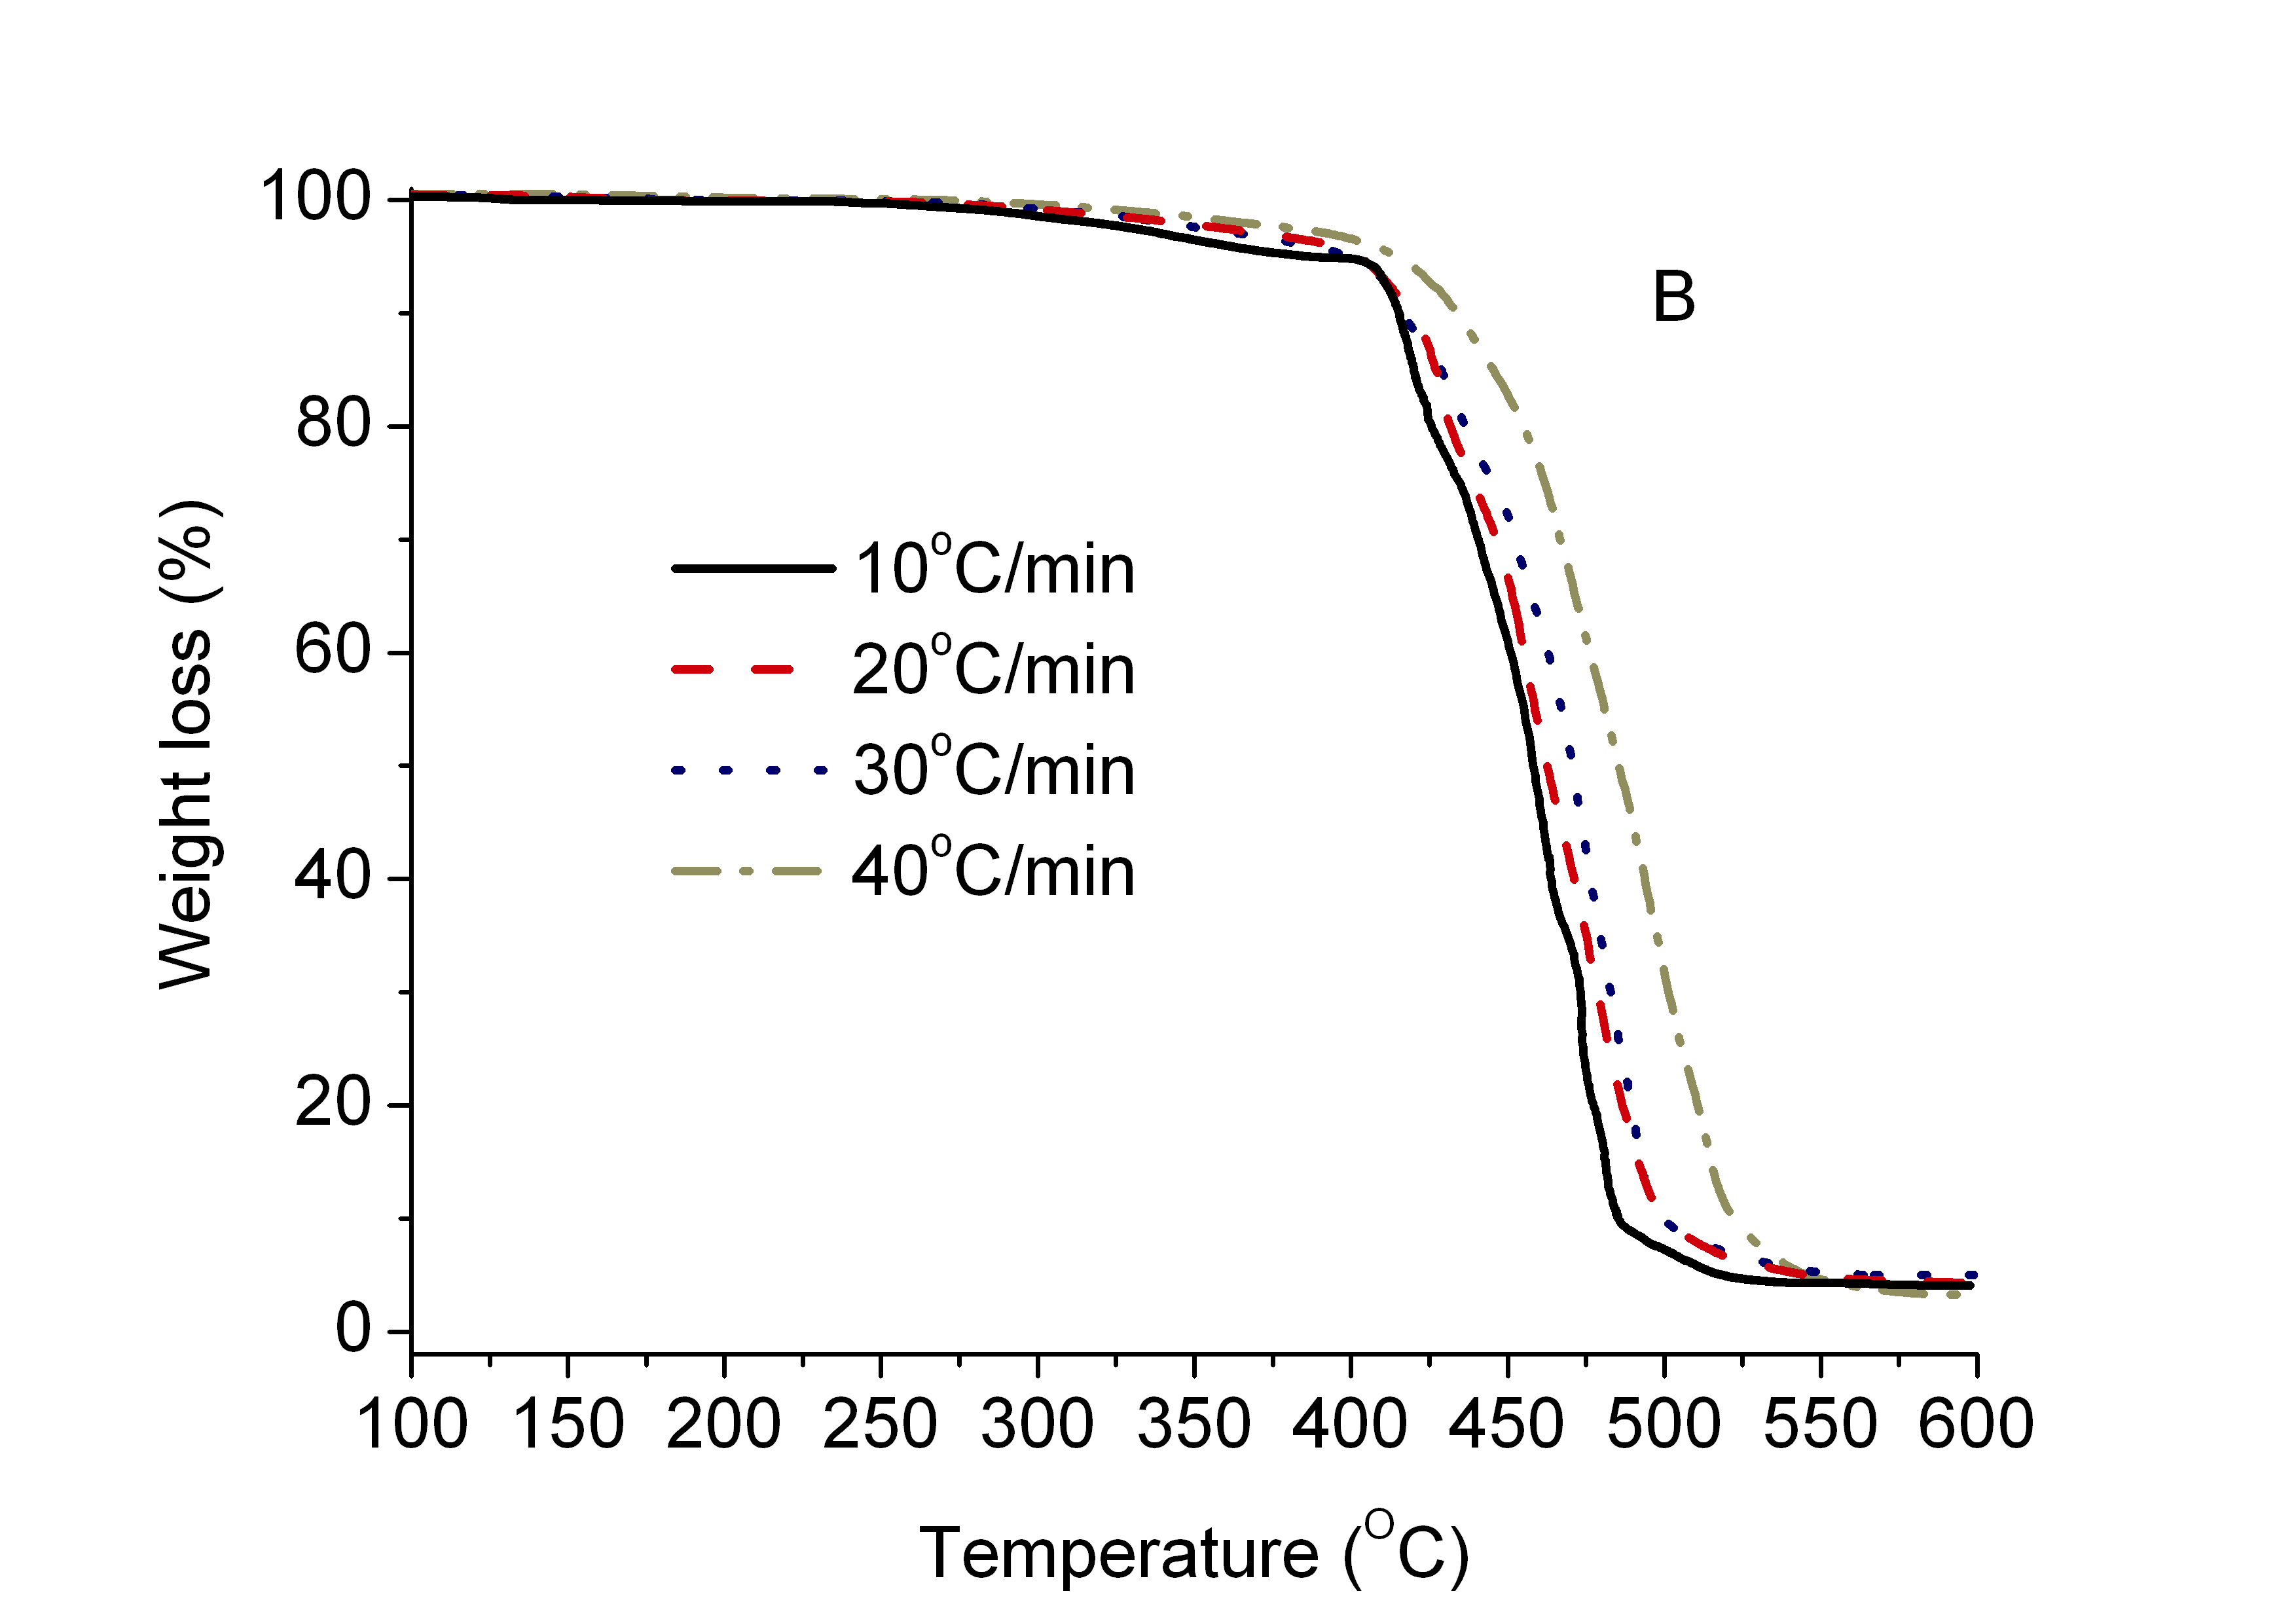


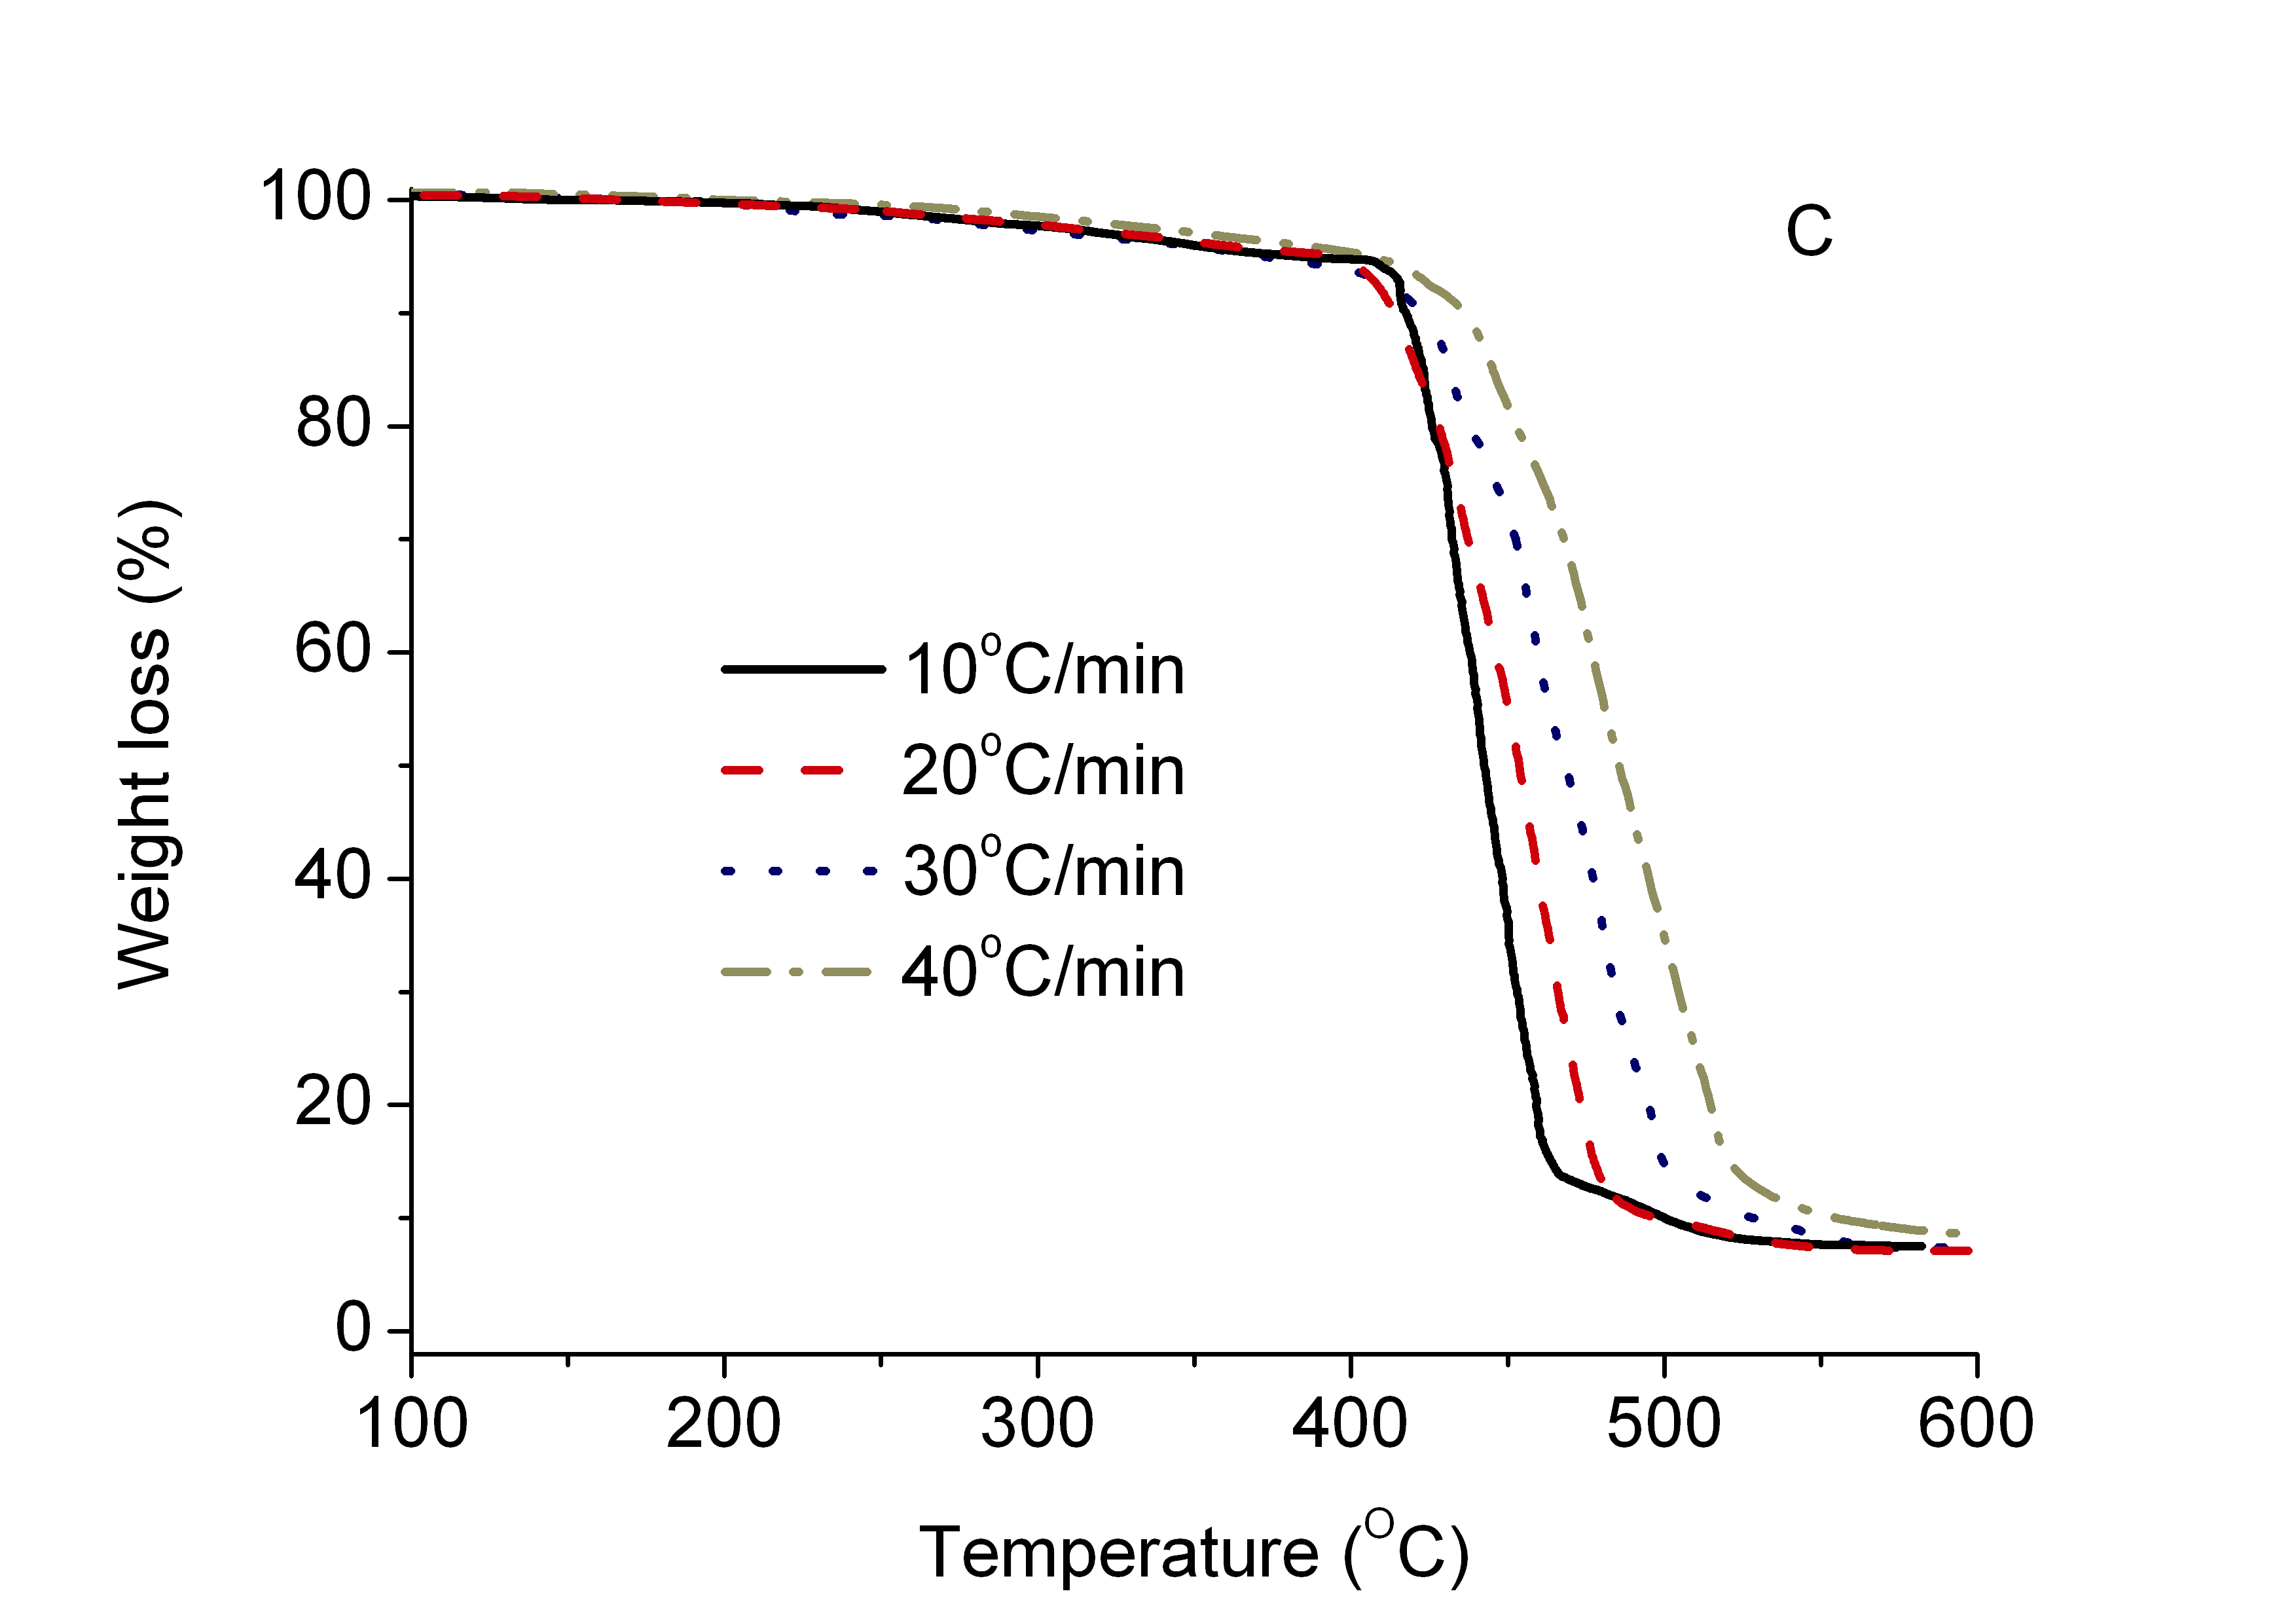


**Figure S2.** TGA curves at different heating rates for (A) pure LLDPE, (B) NC5, and (C) NC10.
